# Supplementary material for: Aspiletrein A Induces Apoptosis Cell Death via Increasing Reactive Oxygen Species Generation and AMPK Activation in Non-Small-Cell Lung Cancer Cells
Source: MDPI journal article supplement (doi:10.3390/ijms23169258), 2022-08-17
Supplement: s1 [file s1]

*Supplementary information for*

**Aspiletrein A induces apoptosis cell death via increasing reactive oxygen species generation and AMPK activation in non-small cell lung cancer cells**

Wasita Witayateeraporn<sup>1</sup>, Hien Minh Nguyen<sup>2</sup>, Duc Viet Ho<sup>3</sup>, Hoai Thi Nguy<sup>3</sup>, Pithi Chanvorachote<sup>1</sup>, Chanida Vinayanuwattikun<sup>4</sup>, Varisa Pongrakhananon<sup>1,5\*</sup>

<sup>1</sup> Department of Pharmacology and Physiology, Faculty of Pharmaceutical Sciences, Chulalongkorn University, Bangkok, 10330 Thailand

<sup>2</sup> Faculty of Pharmacy, Ton Duc Thang University, Ho Chi Minh City, 700000 Vietnam

<sup>3</sup> Faculty of Pharmacy, Hue University of Medicine and Pharmacy, Hue City, 49000 Vietnam

<sup>4</sup> Division of Medical Oncology, Department of Medicine, Faculty of Medicine, Chulalongkorn University, Bangkok, 10330 Thailand

<sup>5</sup> Preclinical Toxicity and Efficacy Assessment of Medicines and Chemicals Research Unit, Chulalongkorn University, Bangkok, 10330 Thailand

**\*Corresponding author**

Varisa Pongrakhananon, Department of Pharmacology and Physiology,  
Faculty of Pharmaceutical Sciences, Chulalongkorn University, 254 Phayathai, Wangmai,  
Pathumwan, Bangkok, Thailand 10330

Tel: +662-218-8325; Fax: +662-218-8340

Email: Varisa.p@pharm.chula.ac.th

## Supplementary materials and methods

### *Quantitative real time polymerase chain reaction (qRT-PCR)*

A number of  $3 \times 10^5$  cells/well were seeded onto 6-well plates for 24 h, and further treated with 25 and 50  $\mu\text{M}$  of AA for 24 h. The mRNA was extracted by GENEzol reagent (Geneaid Biotech, New Taipei, Taiwan), and reverse transcribed by SuperScript<sup>TM</sup> III Reverse Transcriptase (Invitrogen, Carlsbad, CA, USA). A 20  $\mu\text{l}$  of reaction was prepared by mixture of cDNA template, 2x SensiFAST<sup>TM</sup>SYBR<sup>®</sup> No-ROX Kit, and primers. The mRNA expression of Bcl-2 was analyzed by using StepOnePlus Real-Time PCR system (Applied Biosystems, Loughborough, UK). The primers used were applied as following: *Bcl-2* forward primer: 5'-GCAGTGTGGTCTCCGAATGTC-3'; *Bcl-2* reverse primer: 5'-CATTGCCTCTCCTCACGTTCC-3'; *GAPDH* forward primer: 5'-ACATCGCTCAGACACCATG-3'; *GAPDH* reverse primer: 5'-TGTAGTTGAGGTCAATGAAGGG-3'. The expression levels were evaluated using  $2^{-\Delta\Delta C_t}$  method.

### *Cell culture and selectivity index (SI) assessment*

Human bronchial epithelial (BEAS-2B) cells were obtained from the American Type Culture Collection (ATCC; Manassas, VA, USA). Cells were cultured in DMEM, supplemented with 10% fetal bovine serum albumin, 2 mM L-glutamine, and 100 U/mL penicillin-streptomycin. Cell were maintained in 5% CO<sub>2</sub> at 37 °C. For selectivity index (SI) assessment, BEAS-2B cells were treated with various concentrations of AA for 24 h, and cell viability was examined by MTT assay. SI was calculated from IC<sub>50</sub> of BEAS-2B cells to IC<sub>50</sub> of cancer cells. The greater SI value indicates the higher selectivity to cancer [60].

### Supplementary Figure S1

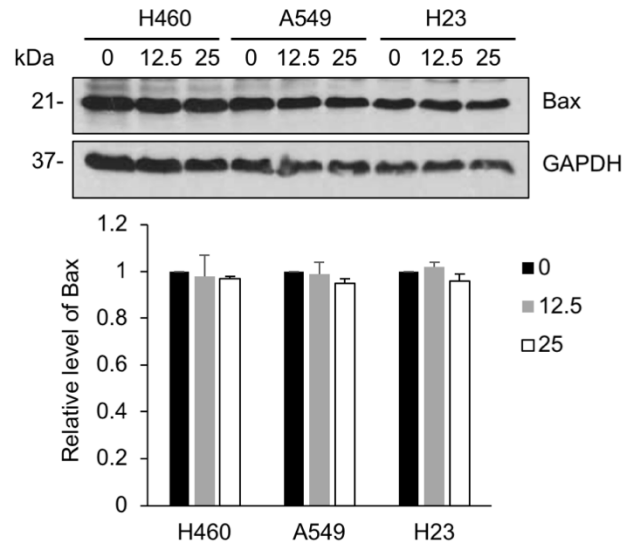

**Figure S1.** Effect of AA on Bax expression. The level of Bax was analyzed by western blotting. Blots were re-probed with anti-GAPDH to confirm equal loading. Protein level was quantified and presented as relative value to the control. Data are mean  $\pm$  SEM (n = 4). \* $p$  < 0.05 vs control group.

## Supplementary Figure S2

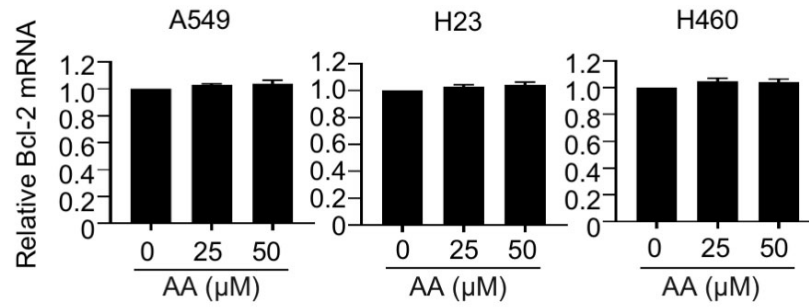

**Figure S2.** The effect of AA on Bcl-2 mRNA expression. Cells were treated with AA (0-50  $\mu$ M) for 24 h. The mRNA was extracted and converted to cDNA. The mRNA level was analyzed by qRT-PCR using specific primer to Bcl-2 and GAPDH as loading control. Data are mean  $\pm$  SEM from three independent experiments. \*  $p < 0.05$  vs control group.

**Supplementary Table S1** Cytotoxicity of AA against lung cancer and normal lung epithelial cell lines.

| Lung cancer<br>cell lines | IC <sub>50</sub><br>(μM ± SD) | Bronchial epithelial<br>cell line | IC <sub>50</sub><br>(μM ± SD) | SI   |
|---------------------------|-------------------------------|-----------------------------------|-------------------------------|------|
| A549                      | 9.60 ± 2.57                   | BEAS-2B                           | 25.11 ± 4.73                  | 2.6  |
| H23                       | 11.43 ± 3.07                  |                                   |                               | 2.19 |
| H460                      | 15.44 ± 3.29                  |                                   |                               | 1.62 |
